# Supplementary material for: Efficient dye nanofiltration of a graphene oxide membrane via combination with a covalent organic framework by hot pressing
Source: Royal Society of Chemistry journal article supplement (doi:10.1039/c9ta07684k), 2019-01-01
Supplement: c9ta07684k1.pdf [file c9ta07684k1.pdf]

## Supporting Information

### **Efficient Dye Nanofiltration of Graphene Oxide Membrane via Combining with Covalent Organic Framework by Hot Pressing**

Guodong Kong<sup>a</sup>, Jia Pang<sup>a</sup>, Yucheng Tang<sup>a</sup>, Lili Fan<sup>b</sup>, Haixiang Sun<sup>b</sup>, Rongming Wang<sup>a, b</sup>, Shou Feng<sup>a</sup>, Yang Feng<sup>a</sup>, Weidong Fan<sup>a</sup>, Wenpei Kang<sup>a, b</sup>, Hailing Guo<sup>c</sup>, Zixi Kang<sup>a, b, \*</sup>, Daofeng Sun<sup>a, b, \*</sup>

a College of Science, China University of Petroleum (East China), Qingdao, Shandong, 266580, PR China.

b School of Materials Science and Engineering, China University of Petroleum (East China), Qingdao, Shandong, 266580, PR China.

c State Key Laboratory of Heavy Oil Processing, Key Laboratory of Catalysis, China National Petroleum Corp. (CNPC), China University of Petroleum (East China), Qingdao, Shandong, 266580, PR China.

\*E-mail: [kzx@upc.edu.cn](mailto:kzx@upc.edu.cn)

[dfsun@upc.edu.cn](mailto:dfsun@upc.edu.cn)

## Table of Contents

I. Supporting figures

II. Supporting tables

III. Supporting references

## I. Supporting figures

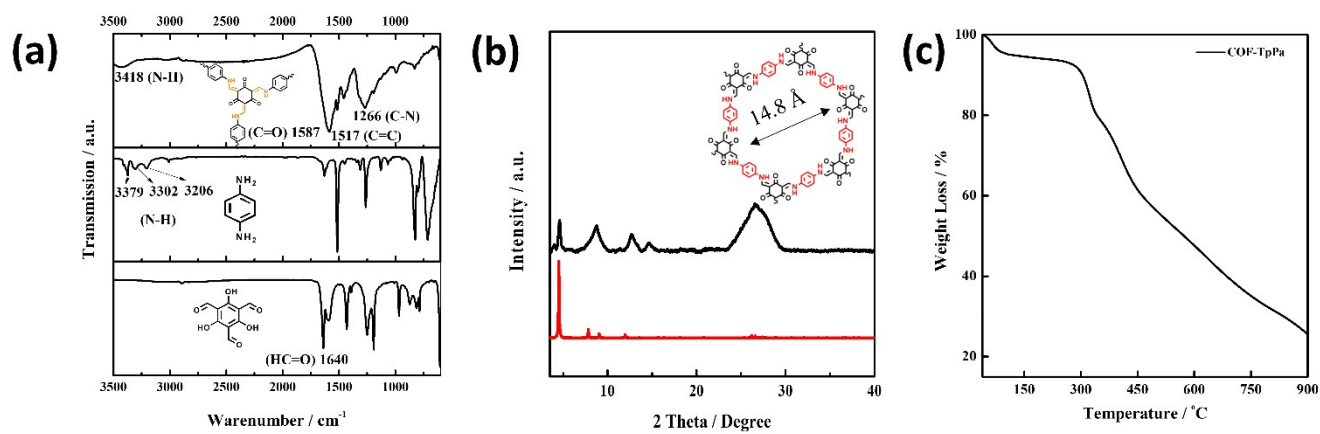

Fig. S1. (a) comparison of the FTIR of COF-TpPa with the monomer of 2,4,6-Trihydroxy-1,3,5-benzenetricarboxaldehyde and 1,4-diaminobenzene; (b) PXRD pattern of COF-TpPa and (c) TGA curves for COF-TpPa.

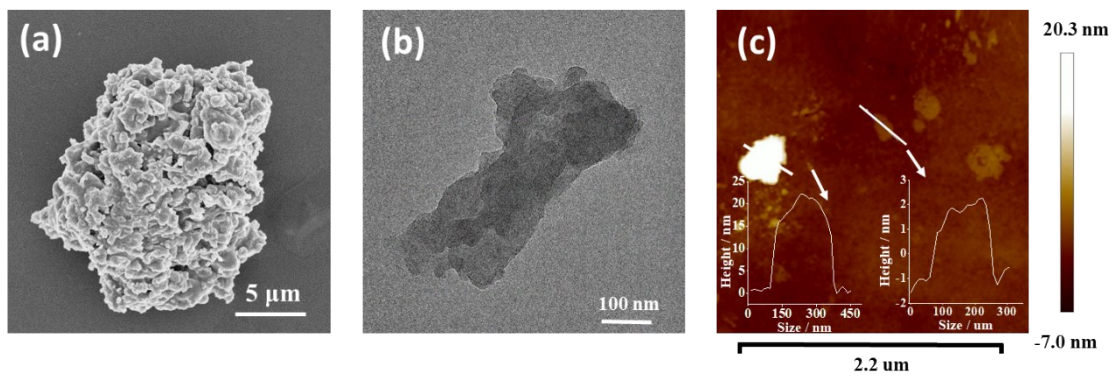

Fig. S2. (a) SEM, (b) TEM and (c) AFM images of COF-TpPa sample.

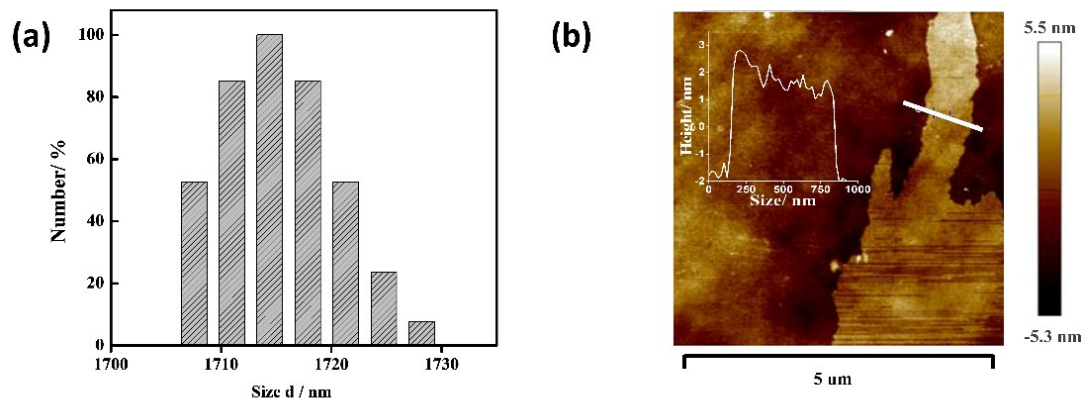

Fig. S3. (a) Particle size distribution of GO nanosheets from DLS; (b) AFM image and height profile of GO nanosheets.

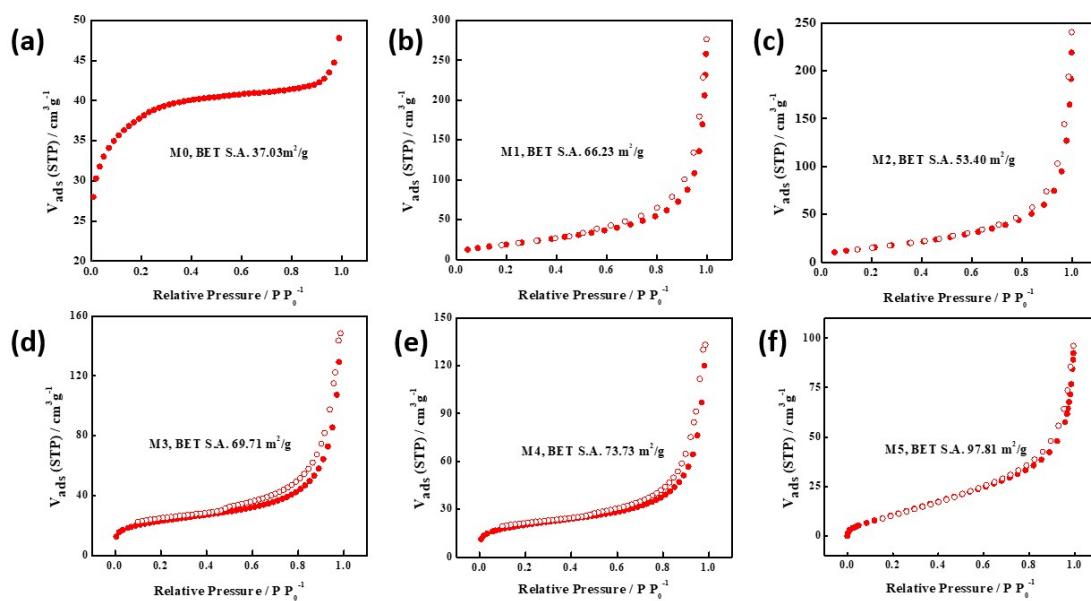

Fig. S4 The  $N_2$  adsorption isotherms at 77 K for the different membranes.

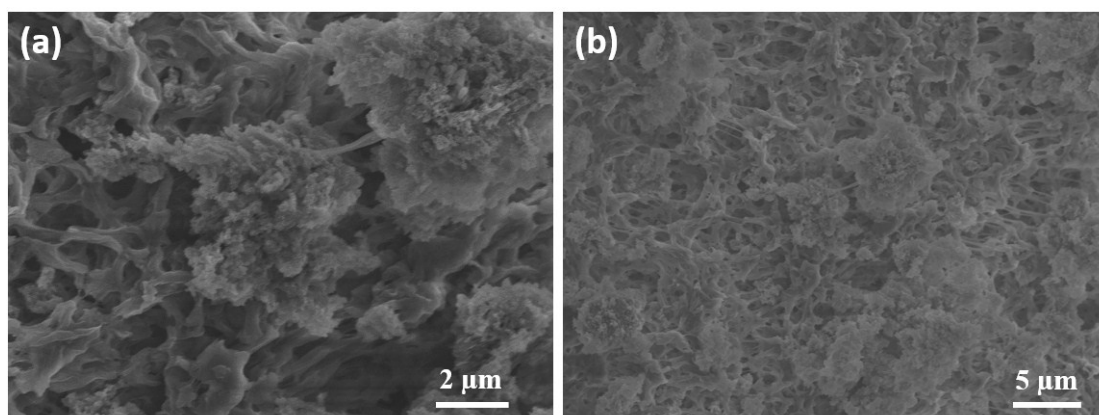

Fig. S5 Top-view SEM of pure COF-TpPa membrane (M5).

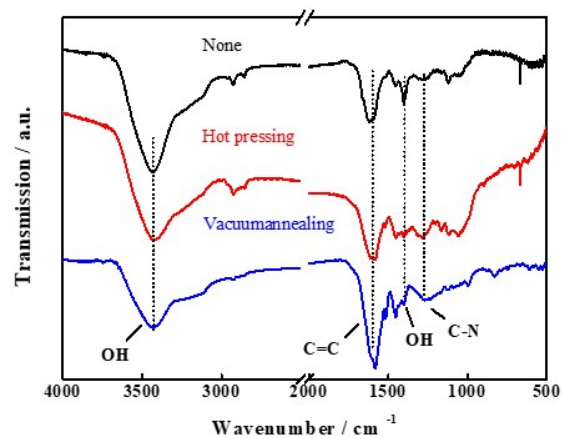

Fig. S6 Comparison of FTIR of different treated COF-TpPa/GO membrane



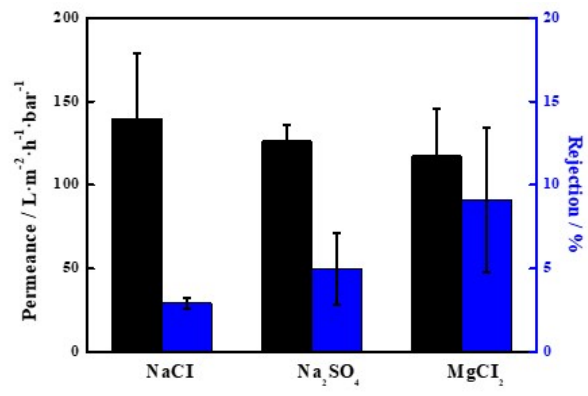

Fig. S7 The nanofiltration performance of three salt solutions (1000 ppm) on M2

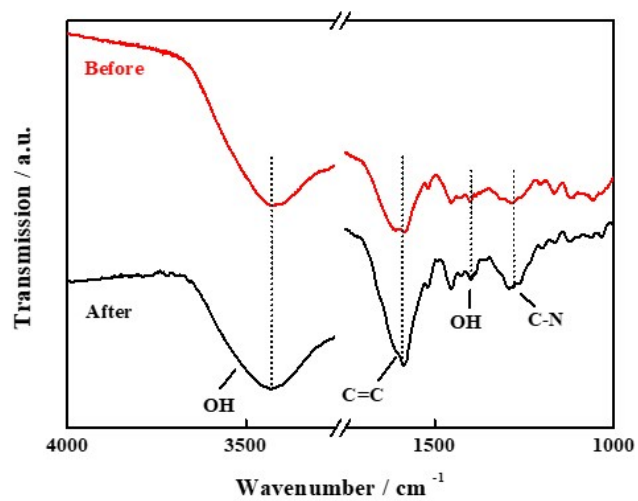

Fig. S8 FTIR of HP-COF-TpPa/GO membrane after nanofiltration test.

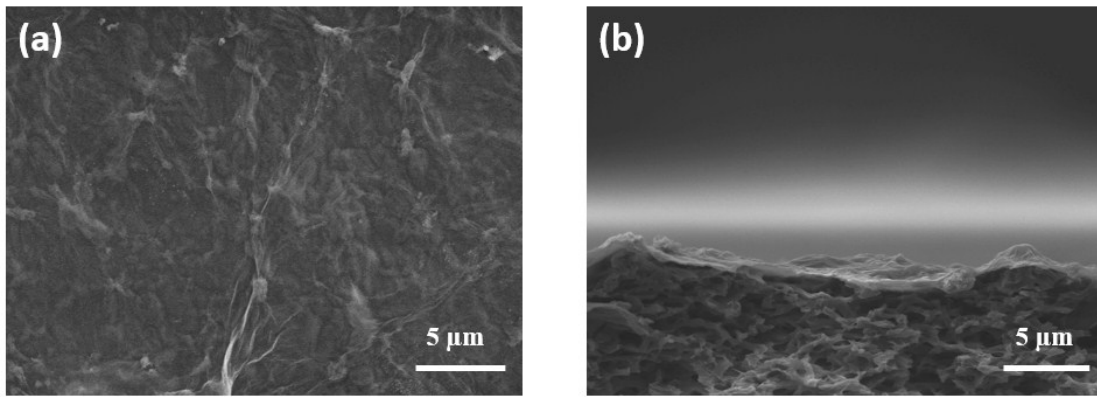

Fig. S9 (a) Top-view and (b) cross-section SEM of HP-COF-TpPa/GO membrane after nanofiltration test.

## II. Supporting tables

Table S1 The composition of different membranes.

| ID | Membrane       | COF (50 mg L <sup>-1</sup> ) | GO (10 mg L <sup>-1</sup> ) | HP process |
|----|----------------|------------------------------|-----------------------------|------------|
| M0 | GO             | 0 mL                         | 30 mL                       | No         |
| M1 | COF-TpPa/GO    | 25 ml                        | 30 mL                       | No         |
| M2 | HP-COF-TpPa/GO | 25 mL                        | 30 mL                       | Yes        |
| M3 | HP-COF-TpPa/GO | 30 mL                        | 30 mL                       | Yes        |
| M4 | HP-COF-TpPa/GO | 35 mL                        | 30 mL                       | Yes        |
| M5 | COF-TpPa       | 25 mL                        | 0 mL                        | No         |

Table S2 Roughness of different membranes measured by AFM.

| Membrane | Ra <sup>a</sup> | Rq <sup>b</sup> |
|----------|-----------------|-----------------|
| M1       | 141.24          | 178.11          |
| M2       | 121.76          | 159.21          |
| M3       | 156.09          | 184.48          |
| M4       | 201.18          | 246.85          |

a The mean roughness (Ra), b the root mean square of the Z value (Rq)

Table S3 Comparison of nanofiltration performance of different treated COF-TpPa/GO membrane

| Treatment        | Water permeance ( $\text{L m}^{-2} \text{h}^{-1} \text{bar}^{-1}$ ) | Rejection rate (%) |
|------------------|---------------------------------------------------------------------|--------------------|
| None             | 226.28                                                              | 68.57              |
| Vacuum annealing | 170.25                                                              | 78.18              |
| Hot-pressing     | 166.75                                                              | 97.05              |

Table S4 The structure and property of dyes molecules and COF-TpPa in this study.

|                    | Crystal violet                                                                    | Methylene blue                                                                    | Acid chrome blue K                                                                 | COF-TpPa                                                                            |
|--------------------|-----------------------------------------------------------------------------------|-----------------------------------------------------------------------------------|------------------------------------------------------------------------------------|-------------------------------------------------------------------------------------|
| Chemical structure |  |  |  |  |
| Size <sup>a</sup>  | 13.05 Å×13.05 Å                                                                   | 13.17 Å×5.27 Å                                                                    | 16.82 Å×7.90 Å                                                                     | 14.8Å <sup>b</sup>                                                                  |
| Mol. wt.           | 393.95 g·mol <sup>-1</sup>                                                        | 393.95 g·mol <sup>-1</sup>                                                        | 586.42 g·mol <sup>-1</sup>                                                         | -                                                                                   |
| Charge             | Positive                                                                          | Positive                                                                          | Negative                                                                           | Positive                                                                            |

a the molecular sizes were calculated with ChemSketch.

b the pore size of COF material

Table S5 Summary of membrane NF performances from this work and references

| Membrane       | Dye                | Pressure<br>(bar) | P (L m <sup>-2</sup> h <sup>-1</sup> bar <sup>-1</sup> ) | Rejection rate<br>(Bar) | Reference |
|----------------|--------------------|-------------------|----------------------------------------------------------|-------------------------|-----------|
| HP-COF-TpPa/GO | Crystal violet     | 1                 | 135.29                                                   | 98.24%                  | This work |
|                | Methylene blue     | 1                 | 166.8                                                    | 97.05%                  |           |
|                | Acid chrome blue K | 1                 | 161.8                                                    | 68.57%                  |           |
| GO             | Methylene blue     | 1                 | 11.5                                                     | 96.29%                  | [1]       |
| GO/PAN         | Methylene blue     | 2                 | 23.33                                                    | 97.6%                   | [2]       |
| GO/Nylon       | Methylene blue     | 1                 | 11.13                                                    | 98.97%                  | [3]       |
| PEI-PDA/PES    | Methylene blue     | 2                 | 7.25                                                     | 96.52%                  | [4]       |
| UIO-66-GO      | Methylene blue     | -                 | 15                                                       | 98.7%                   | [5]       |
| GO             | Methylene blue     | 3.4               | 27.6                                                     | 66%                     | [6]       |
| PQ-10/PVA      | Crystal violet     | 7                 | 8                                                        | 99.2%                   | [7]       |
| PEI/PVA        | Crystal violet     | 6                 | 2.83                                                     | 75.9%                   | [8]       |
| PEI/CMCNa/PP   | Crystal violet     | 3                 | 13.4                                                     | 97.9%                   | [9]       |
| PA/UIO-66      | Crystal violet     | 5                 | 13                                                       | 90%                     | [10]      |
| PA/PPEA        | Acid chrome blue K | 10                | 18.4                                                     | 99.2%                   | [11]      |
| COF-LZU1       | Chrome black T     | 5                 | 75.6                                                     | 98.2%                   | [12]      |
| COF-LZU1       | Acid Fuchsin       | 5                 | 58.05                                                    | 91.4%                   | [12]      |
| COF-LZU1       | Congo red          | 5                 | 53.43                                                    | 98.6%                   | [12]      |
| COF-LZU1       | Methyl blue        | 5                 | 48.58                                                    | 99.2%                   | [12]      |



Table S6 Comparison of nanofiltration performance of HP-COF-TpPa/GO membrane before and after etching treatment.

| Etching treatment | Water permeance ( $\text{L m}^{-2} \text{h}^{-1} \text{bar}^{-1}$ ) | Rejection rate (%) |
|-------------------|---------------------------------------------------------------------|--------------------|
| Original          | 166.75                                                              | 97.05              |
| pH = 2            | 105.65                                                              | 95.00              |
| pH = 7            | 121.91                                                              | 94.67              |
| pH = 11           | 111.77                                                              | 92.34              |

### III. Supporting references

1. L. Chen, Y. Li, L. Chen, N. Li, C. Dong, Q. Chen, B. Liu, Q. Ai, P. Si, J. Feng, L. Zhang, J. Suhr, J. Lou and L. Ci, *Chemical Engineering Journal*, 2018, **345**, 536-544.
2. C. Zhang, K. Wei, W. Zhang, Y. Bai, Y. Sun and J. Gu, *ACS applied materials & interfaces*, 2017, **9**, 11082-11094.
3. L. Chen, J.-H. Moon, X. Ma, L. Zhang, Q. Chen, L. Chen, R. Peng, P. Si, J. Feng, Y. Li, J. Lou and L. Ci, *Carbon*, 2018, **130**, 487-494.
4. R. Zhang, Y. Su, X. Zhao, Y. Li, J. Zhao and Z. Jiang, *Journal of Membrane Science*, 2014, **470**, 9-17.
5. K. Guan, D. Zhao, M. Zhang, J. Shen, G. Zhou, G. Liu and W. Jin, *Journal of Membrane Science*, 2017, **542**, 41-51.
6. M. Hu and B. Mi, *Environmental Science & Technology*, 2013, **47**, 3715-3723.
7. Y. Zheng, G. Yao, Q. Cheng, S. Yu, M. Liu and C. Gao, *Desalination*, 2013, **328**, 42-50.
8. H. Tang, S. Ji, L. Gong, H. Guo and G. Zhang, *Polymer Chemistry*, 2013, **4**, 5621-5628.
9. Q. Chen, P. Yu, W. Huang, S. Yu, M. Liu and C. Gao, *Journal of Membrane Science*, 2015, **492**, 312-321.
10. X. Cheng, X. Jiang, Y. Zhang, C. H. Lau, Z. Xie, D. Ng, S. J. D. Smith, M. R. Hill and L. Shao, *ACS applied materials & interfaces*, 2017, **9**, 38877-38886.
11. C. Wu, S. Zhang, D. Yang and X. Jian, *Journal of Membrane Science*, 2009, **326**, 429-434.
12. H. Fan, J. Gu, H. Meng, A. Knebel and J. Caro, *Angewandte Chemie International Edition*, 2018, **57**, 4083-4087.
